# Supplementary material for: Assembling metal phosphonates in the presence of monodentate-terminal and bidentate-bridging pyridine ligands. Use of non-covalent and covalent-coordinate interactions to build polymeric metal–phosphonate architectures
Source: Royal Society of Chemistry journal article supplement (doi:10.1039/b805848b), 2008-01-01
Supplement: b805848b.pdf [file b805848b.pdf]

## **Supplementary Information for Dalton- B805848B**

**Assembling metal phosphonates in the presence of monodentate-terminal and bidentate-bridging pyridine ligands. Use of non-covalent and covalent-coordinate interactions to build polymeric metal-phosphonate architectures**

**Ramaswamy Murugavel\* and Swaminathan Shanmugan**

---

**Table S1.** Comparison of structural parameters for **1** and **2** with other cubane-phosponates in the literature.

| Compound                                                                              | Space group        | M–O, Å | P–O, Å | M···M face diagonal, Å | P···P face diagonal, Å | M···P face diagonal, Å | M···P body diagonal, Å | M <sup>n+</sup> ionic radius, Å <sup>#</sup> | Ref       |
|---------------------------------------------------------------------------------------|--------------------|--------|--------|------------------------|------------------------|------------------------|------------------------|----------------------------------------------|-----------|
| [ <sup>t</sup> BuPO <sub>3</sub> BEt] <sub>4</sub>                                    | I4 <sub>1</sub> /a | 1.47   | 1.50   | 4.12                   | 3.92                   | 2.85                   | 4.93                   | 0.25                                         | a         |
| [ <sup>t</sup> BuPO <sub>3</sub> B <sup>s</sup> Bu] <sub>4</sub>                      | Pī                 | 1.47   | 1.50   | 4.13                   | 3.93                   | 2.85                   | 4.94                   | 0.25                                         | b         |
| [ <sup>t</sup> BuPO <sub>3</sub> BPh] <sub>4</sub>                                    | P2 <sub>1</sub> /n | 1.46   | 1.50   | 4.15                   | 3.93                   | 2.84                   | 4.92                   | 0.25                                         | c         |
| [ <sup>t</sup> BuPO <sub>3</sub> Al <sup>i</sup> Bu] <sub>4</sub>                     | I4 <sub>1</sub> /a | 1.76   | 1.52   | 4.56                   | 4.42                   | 3.17                   | 5.50                   | 0.53                                         | d         |
| [PhPO <sub>3</sub> Ga <sup>t</sup> Bu] <sub>4</sub>                                   | Pī                 | 1.85   | 1.51   | 4.69                   | 4.42                   | 3.22                   | 5.57                   | 0.61                                         | e         |
| [ <sup>t</sup> BuPO <sub>3</sub> Cu(3,5- <i>t</i> -Bu <sub>2</sub> PzH)] <sub>4</sub> | C2/c               | 1.95   | 1.53   | 3.77                   | 4.43                   | 3.11                   | 5.15                   | 0.71                                         | f         |
| [Ph <sub>3</sub> CPO <sub>3</sub> Co(py)] <sub>4</sub>                                | I4 <sub>1</sub> /a | 1.94   | 1.53   | 4.29                   | 4.82                   | 3.06                   | 5.52                   | 0.72                                         | g         |
| [ <sup>t</sup> BuPO <sub>3</sub> Co(2-apy)] <sub>4</sub>                              | I4 <sub>1</sub> /a | 1.93   | 1.52   | 4.29                   | 4.77                   | 3.14                   | 5.56                   | 0.72                                         | this work |
| [ <sup>t</sup> BuPO <sub>3</sub> Zn(2-apy)] <sub>4</sub>                              | I4 <sub>1</sub> /a | 1.93   | 1.52   | 4.31                   | 4.72                   | 3.19                   | 5.54                   | 0.74                                         | this work |

# Ionic radius for M<sup>n+</sup> in the tetrahedral geometry.

(a) M. G. Walawalkar, R. Murugavel, H. W. Roesky and H.-G. Schmidt, *Organometallics* 1997, **16**, 516.

(b) M. G. Walawalkar, R. Murugavel, H. W. Roesky and H.-G. Schmidt, *Inorg. Chem.*, 1997, **36**, 4202.

(c) K. Diemert, U. Englert, W. Kuchen and F. Sandt, *Angew. Chem., Int. Ed. Engl.*, 1997, **36**, 241

(d) Y. Yang, H.-G. Schmidt, M. Noltemeyer, J. Pinkas and H. W. Roesky, *J. Chem. Soc., Dalton Trans.*, 1996, 3609.

(e) M. R. Mason, M. S. Mashuta and J. F. Richardson, *Angew. Chem.* 1997, **109**, 249; *Angew. Chem., Int. Ed. Engl.* 1997, **36**, 239.

(f) V. Chandrasekhar, L. Nagarajan, R. Clérac, S. Ghosh and S. Verma, *Inorg. Chem.* 2008, **47**, 1067.

(g) V. Baskar, M. Shanmugam, E. C. Sanudo, M. Shanmugam, D. Collison, E. J. L. McInnes, Q. Wei and R. E. P. Winpenny, *Chem. Commun.* 2007, 37.

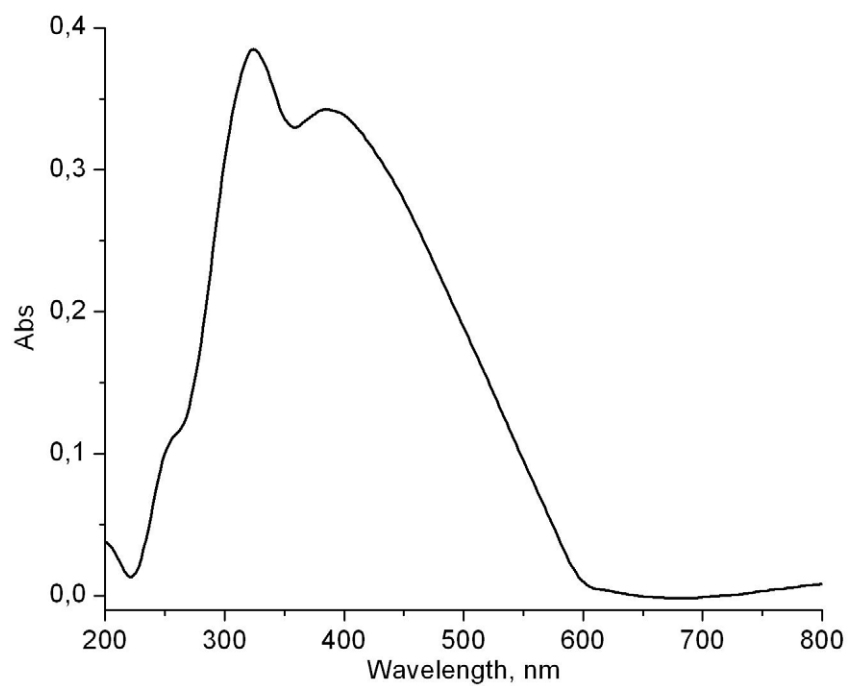

**Figure S1.** Solid State UV-vis spectrum of **1**.

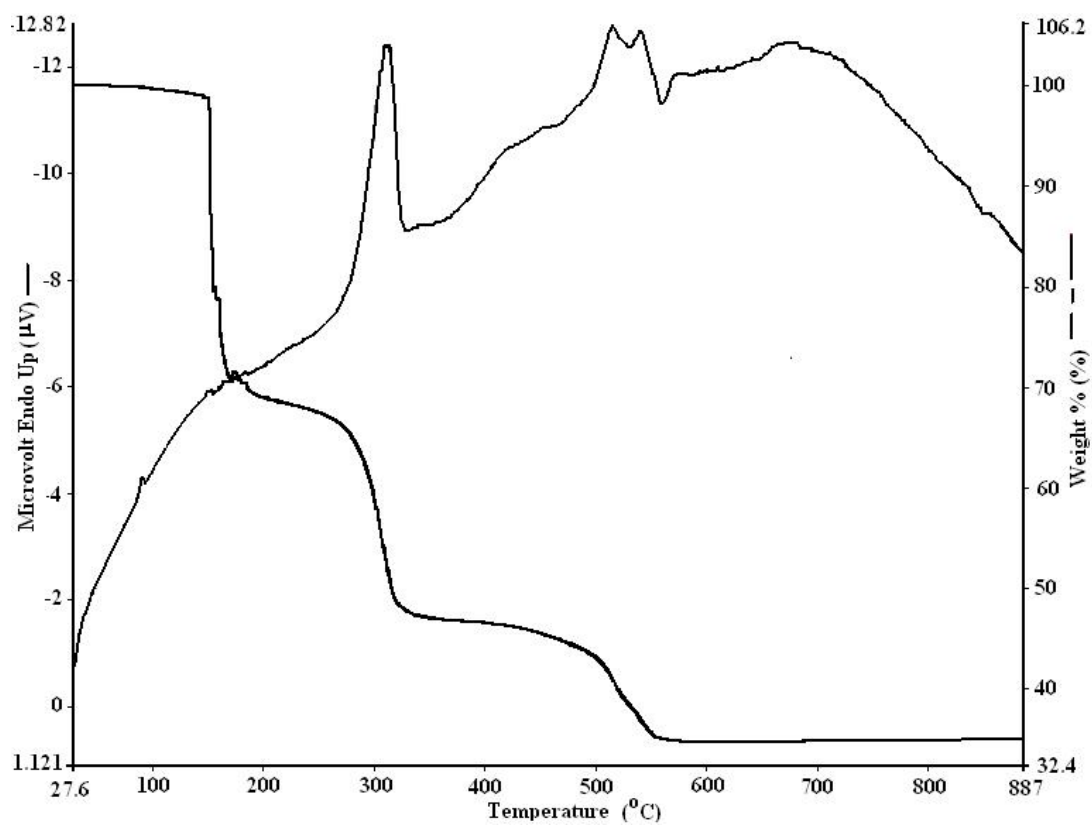

**Figure S2.** Thermal decomposition of **1** at N<sub>2</sub> atm.

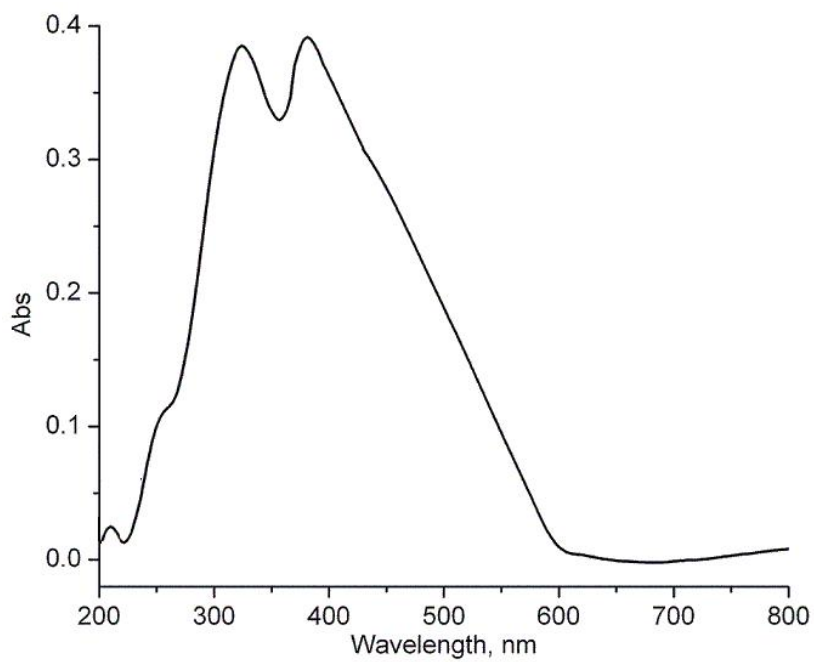

**Figure S3.** Solid State UV-vis spectrum of **2**

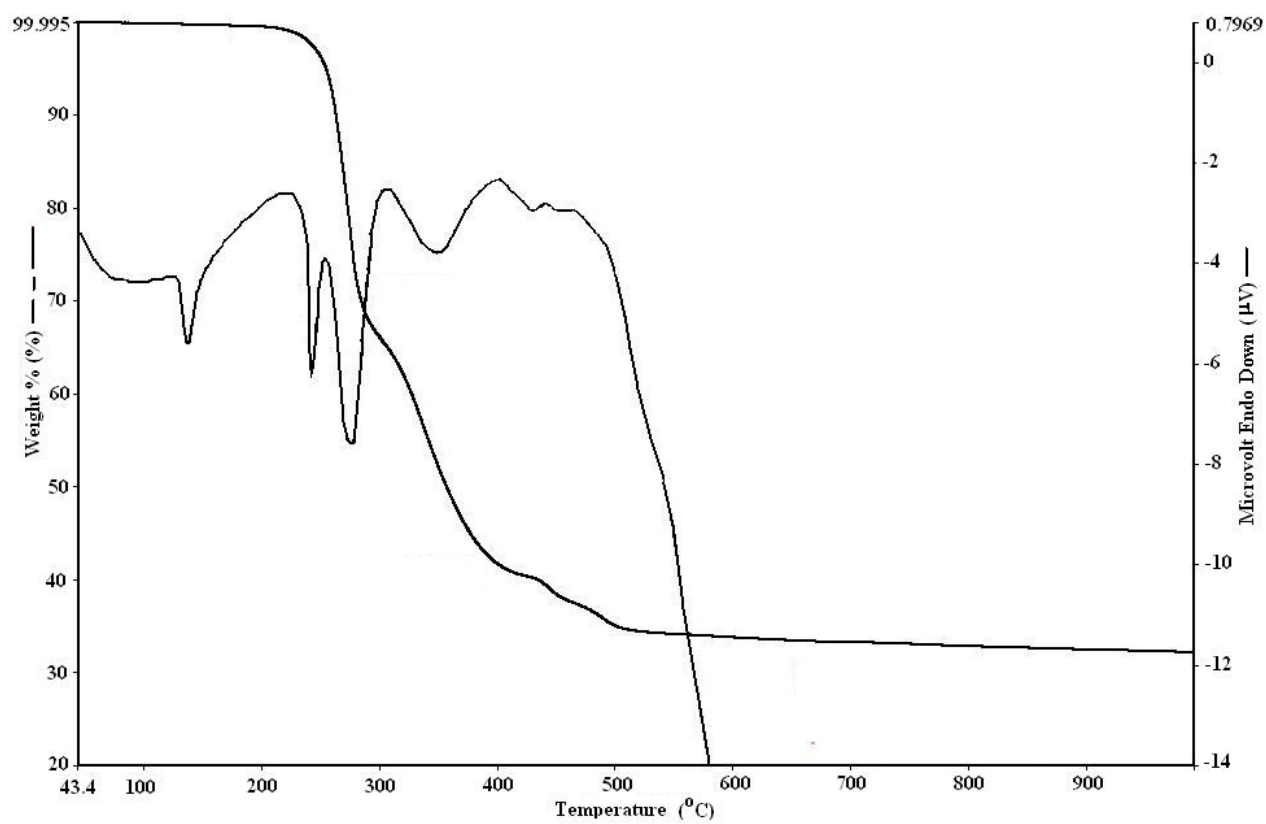

**Figure S4.** Thermal decomposition of **2** at N<sub>2</sub> atm.

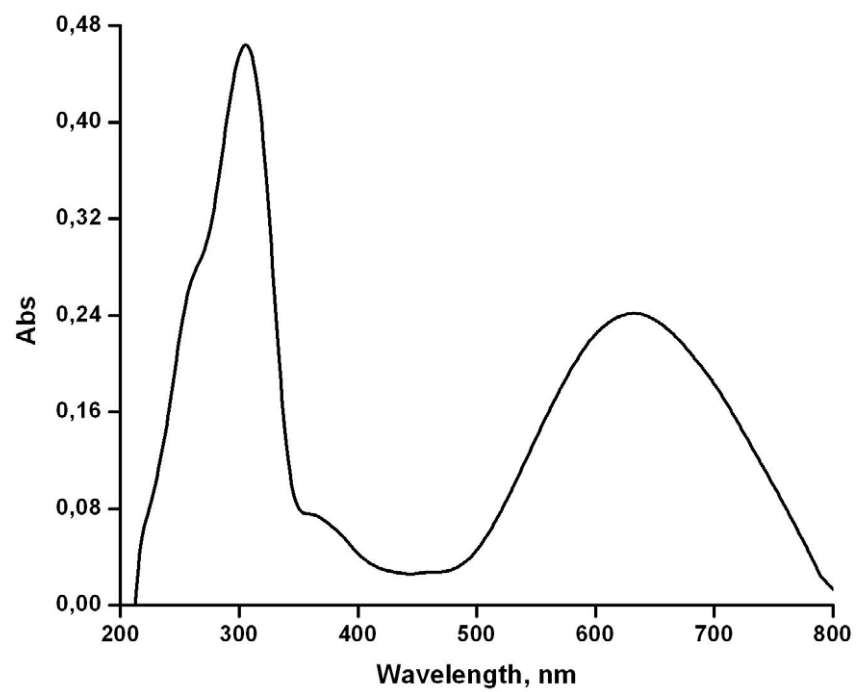

**Figure S5.** Solid State UV-vis spectrum of **3**.

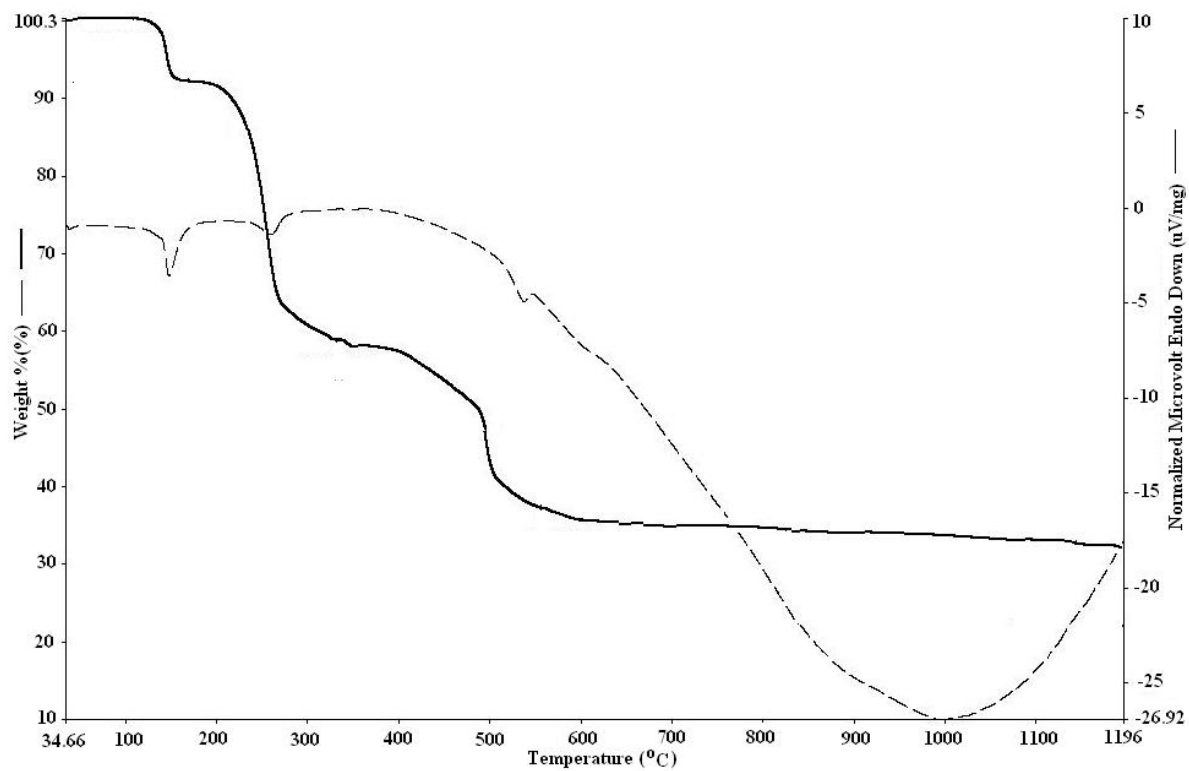

**Figure S6.** Thermal decomposition of **3** at N<sub>2</sub> atm.



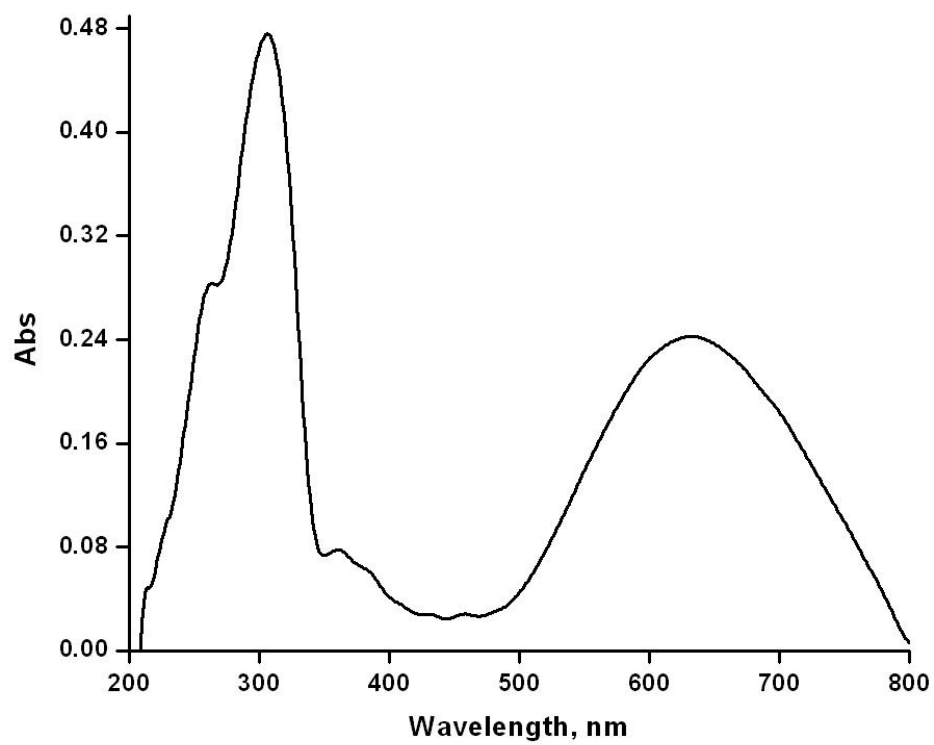

**Figure S7.** Solid State UV-vis spectrum of **4**.

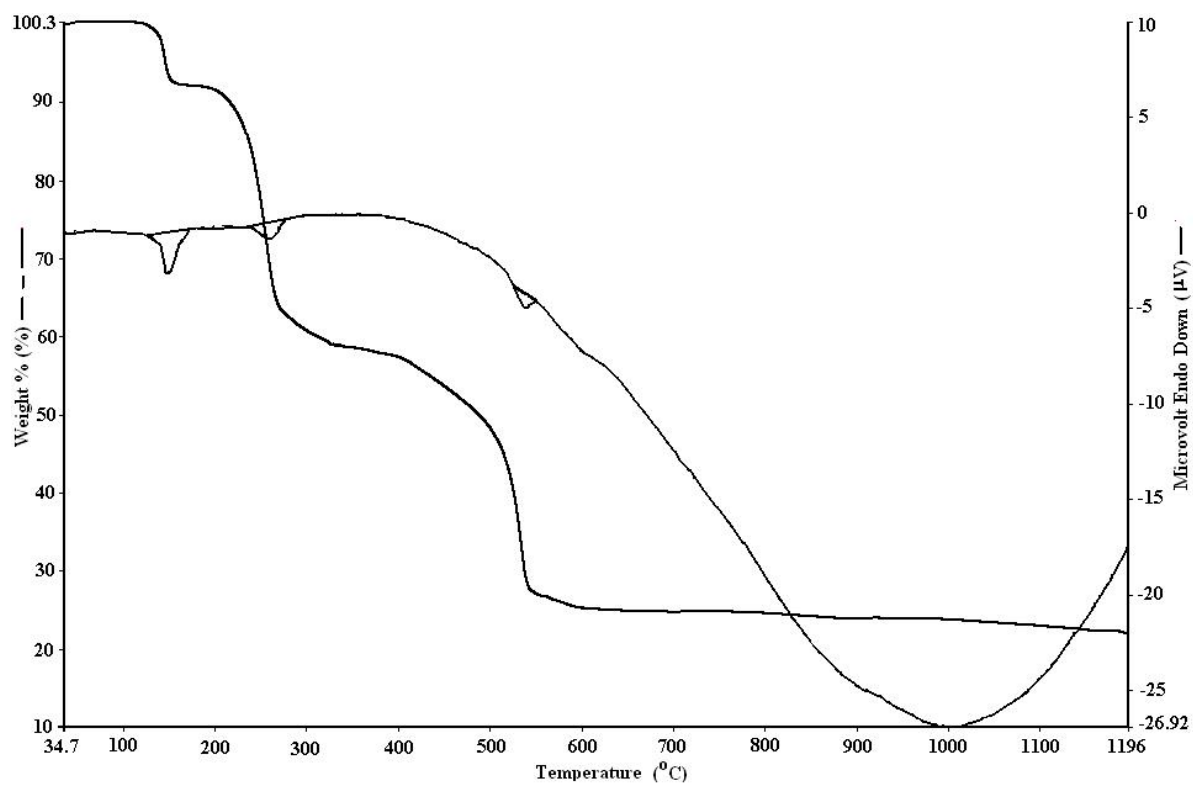

**Figure S8.** Thermal decomposition of **4** at N<sub>2</sub> atm.

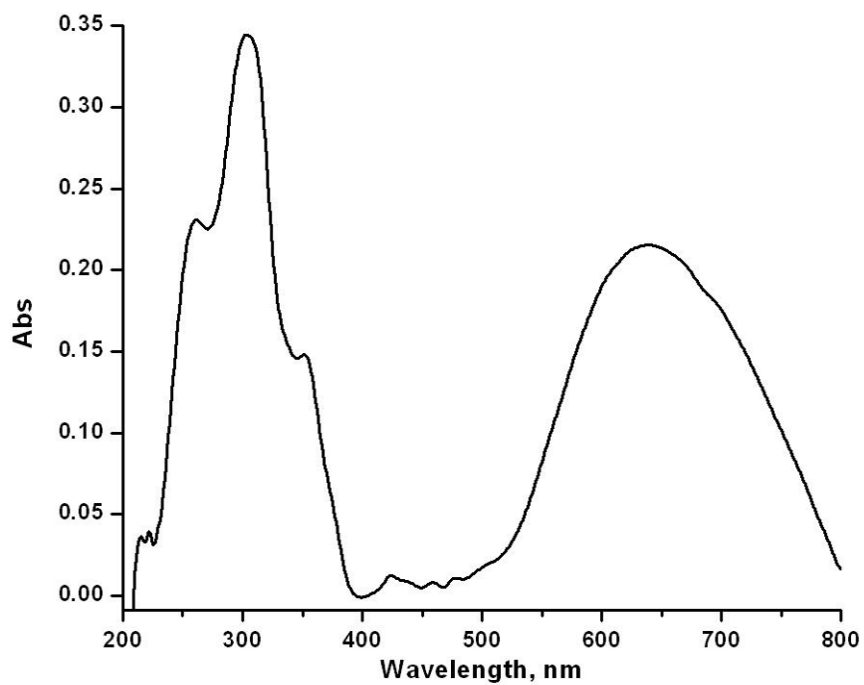

**Figure S9.** Solid State UV-vis spectrum of **5**.

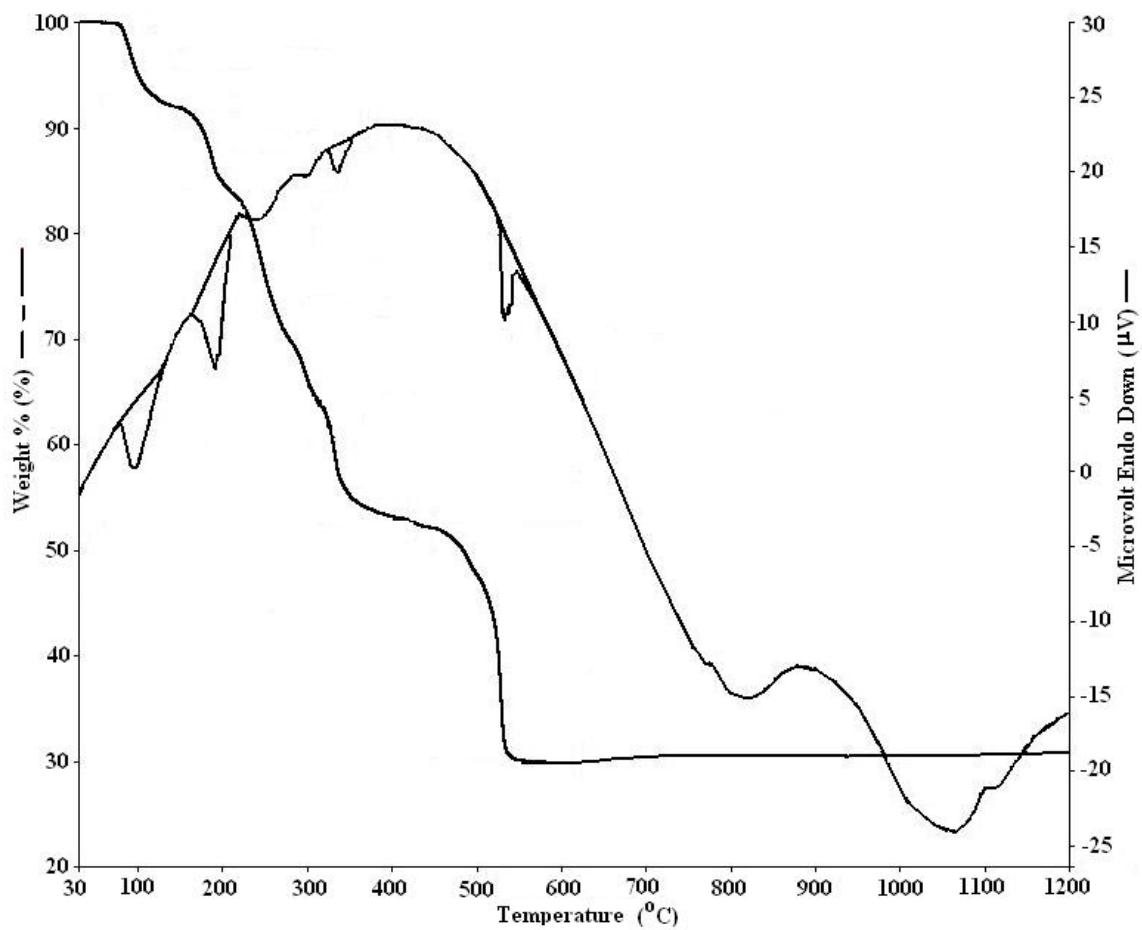

**Figure S10.** Thermal decomposition of **5** at N<sub>2</sub> atm.
